# Supplementary material
Source: PubMed Central journal article supplement (PMC3669666)
Supplement: NIHMS445674-supplement-001.pdf [file NIHMS445674-supplement-001.pdf]

Table S1. Primers used for mutagenesis of AHR1 $\beta$ .

| Mutation | Strand     | sequences                                                      |
|----------|------------|----------------------------------------------------------------|
| T253A    | sense      | 5'-cacagctagcccttttcgctttggctactccacta-3'                      |
|          | anti-sense | 5'-tagtggagttagcceaagcgaaaagggctagctgtg-3'                     |
| S263P    | sense      | 5'-ggctactccactacagcctccttcaatcctgga-3'                        |
|          | anti-sense | 5'-tccaggattgaaggaggctgtagtggagttagcc-3'                       |
| S294Q    | sense      | 5'-attggttgtgatgccaaaggccagatggtgctgggatatacagaa-3'            |
|          | anti-sense | 5'-ttctgtatatcccagcaccatctggcctttggcatcacaaccaat-3'            |
| N325S    | sense      | 5'-cagatatgctctattgtgcagagagtcatacccgatg-3'                    |
|          | anti-sense | 5'-cattcgggtatgactctctgcacaatagagcatatctg-3'                   |
| A354S    | sense      | 5'-gatgggtctgggttcaatcaaacgctcgactagtc-3'                      |
|          | anti-sense | 5'-gactagtgcgagcgtttgattgaaccagaccatc-3'                       |
| A370S    | sense      | 5'-aaaatgggagaccggattatatcatttcatacaaaagagcac-3'               |
|          | anti-sense | 5'-gtgctctttgtgatgaaatgatataatccggtctcccatttt-3'               |
| S371T    | sense      | 5'-gaccggattatatcattgcaacgcaaagagcactaacagagga-3'              |
|          | anti-sense | 5'-tcctctgttagtgctctttgcggttgcaatgatataatccggtc-3'             |
| KHSR     | sense      | 5'-ggcatgactgtgttttagactccttactaaacattctagatgggtctgggttcaag-3' |
|          | anti-sense | 5'-cttgaaccagaccatctagaatgttttagtaaggagtcataaacacagtcatgcc-3'  |
